# Supplementary material
Source: Springer Nature journal article supplement (https://www.springermedizin.de/resource/supplementary/12889_2010_2906_MOESM1_ESM.pdf/9487630)

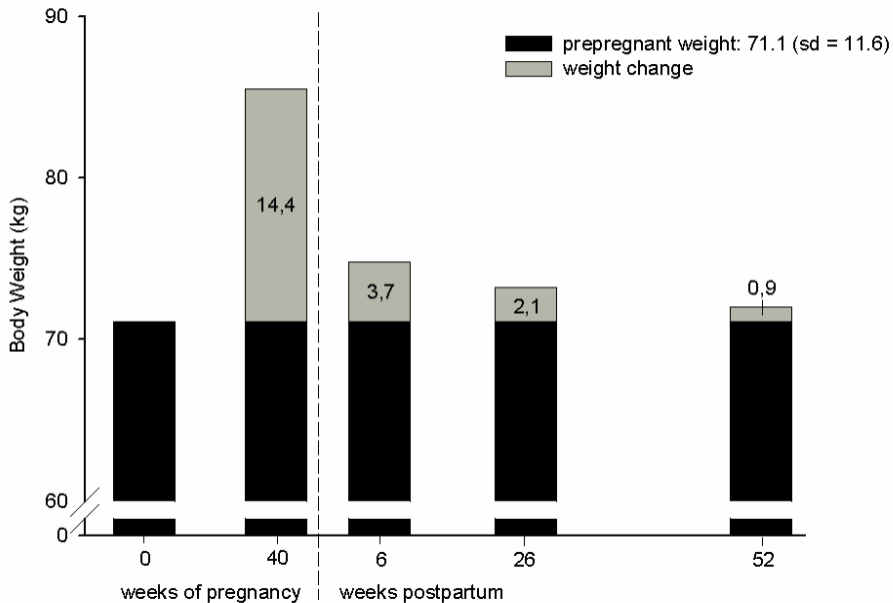

Supplement: MOESM1 [file 9487630]
